# Supplementary material for: Asymmetric kinase dimer formation is crucial for the activation of oncogenic EGFRvIII but not for ERBB3 phosphorylation
Source: PubMed Central journal article supplement (PMC3726407; doi:10.1186/1478-811x-11-39), 2013-06-10

# Supplementary figure 1

## A. Schematic representation of kinase interactions from Figure 1A

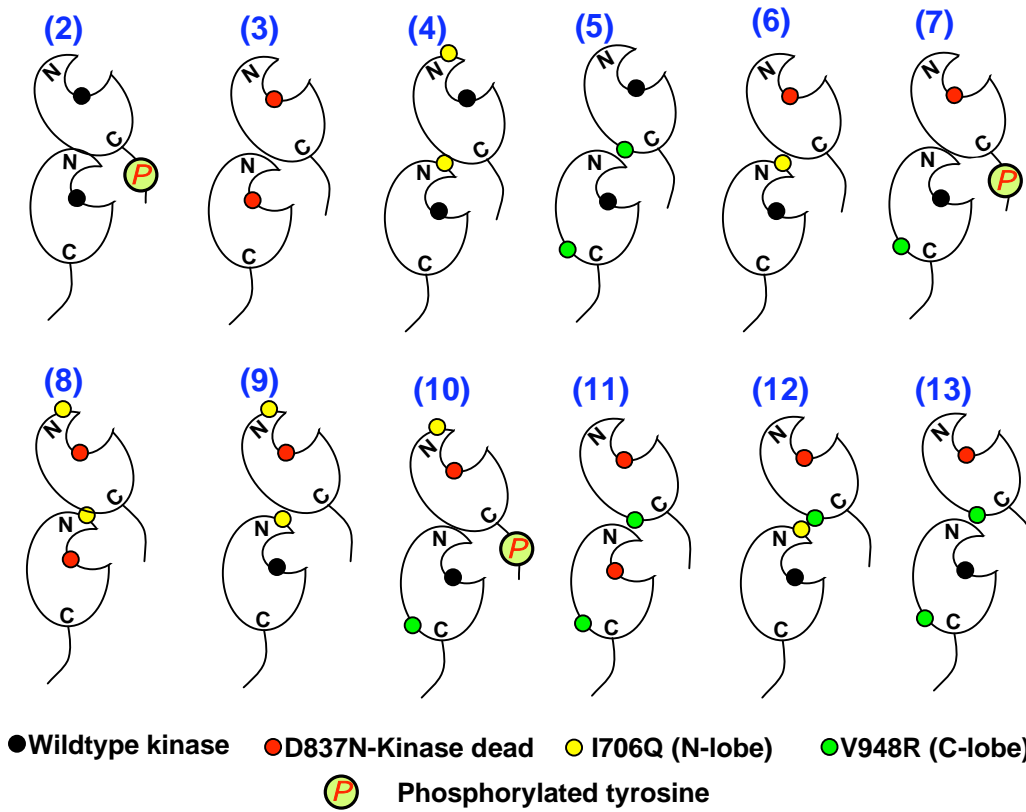

**B. HEK293 cells were transfected with indicated EGFRvIII mutants and their activity was analyzed by western blotting (UT-Untransfected control, WT-Wild-type EGFRvIII, KD-Kinase-dead EGFRvIII)**

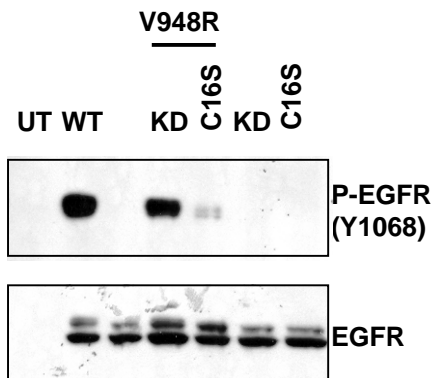

Supplement: 1478-811X-11-39-S2.pdf [file 1478-811X-11-39-S2.pdf]
