# Supplementary material for: Asymmetric kinase dimer formation is crucial for the activation of oncogenic EGFRvIII but not for ERBB3 phosphorylation
Source: PubMed Central journal article supplement (PMC3726407; doi:10.1186/1478-811x-11-39), 2013-06-10

## Supplementary figure 2

### A. Schematic representation of receptor interactions from the Figure 1B

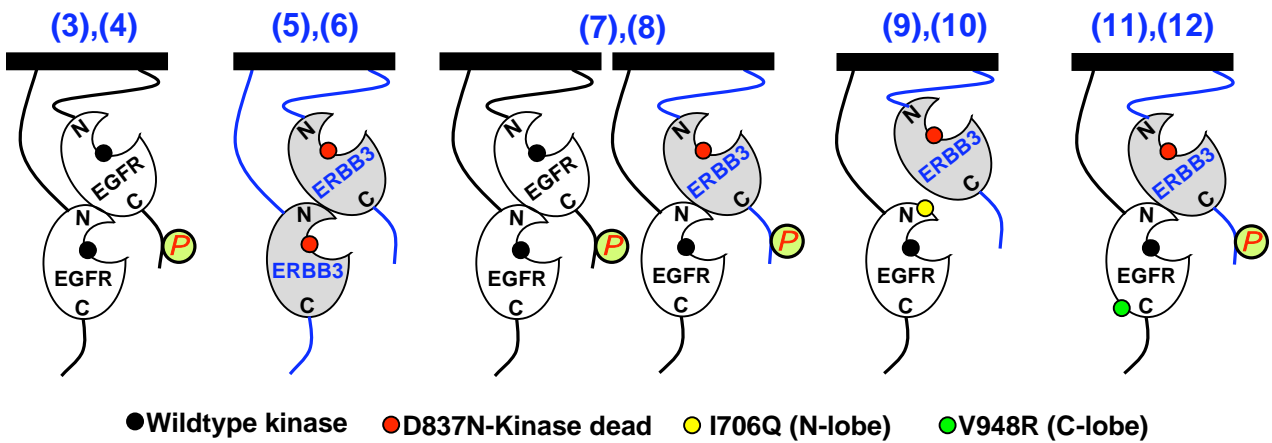

### B. Schematic representation of receptor interactions from the Figure 2A

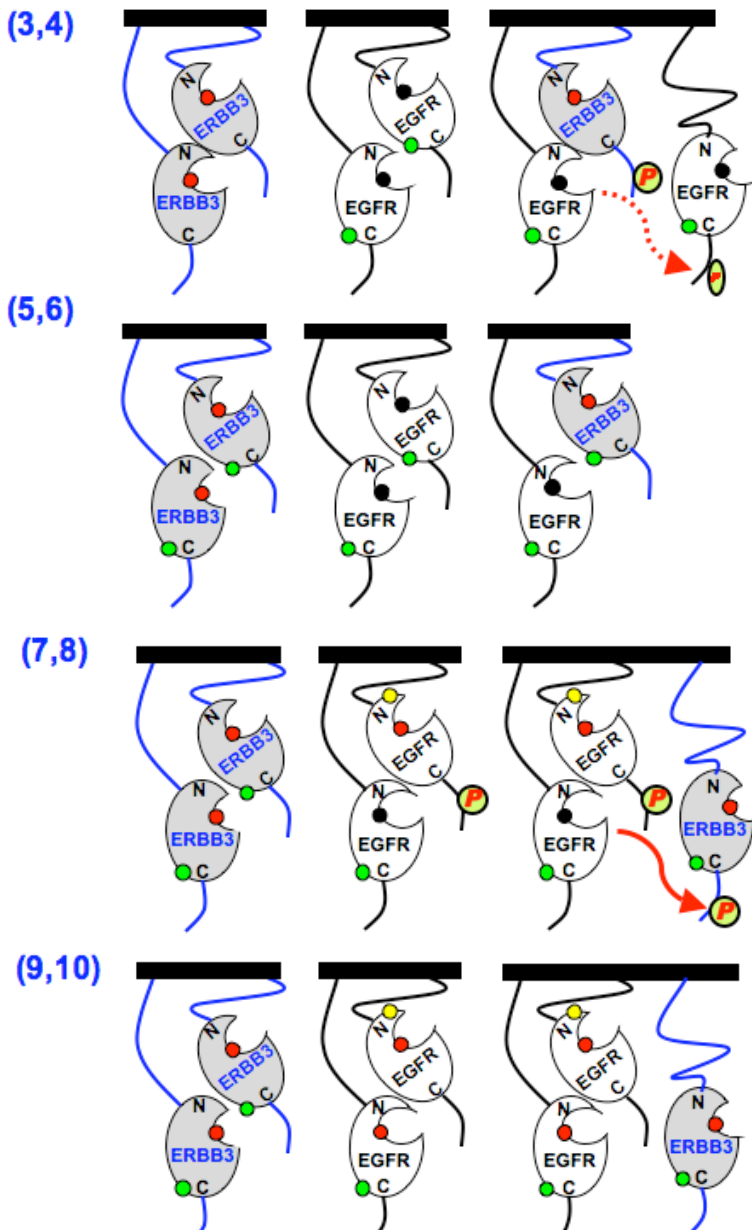

Supplement: 1478-811X-11-39-S3.pdf [file 1478-811X-11-39-S3.pdf]
